# Supplementary material for: P bodies promote stress granule assembly in Saccharomyces cerevisiae
Source: PubMed Central journal article supplement — J Cell Biol. 2008 Nov 3;183(3):441–55. doi: 10.1083/jcb.200807043 (PMC2575786; doi:10.1083/jcb.200807043), 2008-11-03
Supplement: jcb.200807043_5.pdf [file jcb.200807043_5.pdf]

Table S1. Quantitation detail for null strain datasets

| <b>P-Body dataset</b>                        |           |                                   |       |                   |       |               |      |
|----------------------------------------------|-----------|-----------------------------------|-------|-------------------|-------|---------------|------|
| Null strain +/- Glu                          | PB marker | Av. foci size ( $\mu\text{m}^2$ ) | SD    | Cells 1+ foci (%) | SD    | Av. Foci/Cell | SD   |
| BY4741 (WT) -                                | Edc3      | 0.102                             | 0.021 | 93.98             | 4.90  | 2.33          | 0.49 |
| BY4741 (WT) +                                | Edc3      | 0.062                             | 0.014 | 42.57             | 15.80 | 0.65          | 0.37 |
| <i>Pub1</i> $\Delta$ -                       | Edc3      | 0.084                             | 0.006 | 74.19             | 13.39 | 1.26          | 0.50 |
| <i>Pub1</i> $\Delta$ +                       | Edc3      | 0.065                             | 0.004 | 53.49             | 18.35 | 0.95          | 0.48 |
| <i>Ngr1</i> $\Delta$ -                       | Edc3      | 0.096                             | 0.018 | 88.77             | 12.65 | 2.20          | 0.45 |
| <i>Ngr1</i> $\Delta$ +                       | Edc3      | 0.083                             | 0.024 | 59.81             | 17.50 | 0.97          | 0.25 |
| <i>Pbp1</i> $\Delta$ -                       | Edc3      | 0.084                             | 0.032 | 88.14             | 3.92  | 2.10          | 0.38 |
| <i>Pbp1</i> $\Delta$ +                       | Edc3      | 0.060                             | 0.033 | 35.87             | 6.73  | 0.52          | 0.20 |
| <i>eIF4GI</i> $\Delta$ -                     | Edc3      | 0.094                             | 0.029 | 88.03             | 4.99  | 1.46          | 0.39 |
| <i>eIF4GI</i> $\Delta$ +                     | Edc3      | 0.058                             | 0.013 | 39.18             | 25.89 | 0.51          | 0.35 |
| <i>eIF4GII</i> $\Delta$ -                    | Edc3      | 0.089                             | 0.008 | 94.80             | 19.81 | 1.94          | 0.36 |
| <i>eIF4GII</i> $\Delta$ +                    | Edc3      | 0.060                             | 0.008 | 44.21             | 25.61 | 0.66          | 0.56 |
| yRP840 (WT) -                                | Dcp2      | 0.091                             | 0.022 | 81.61             | 11.13 | 2.02          | 0.64 |
| yRP840 (WT) +                                | Dcp2      | 0.049                             | 0.004 | 18.35             | 8.68  | 0.27          | 0.19 |
| <i>Edc3</i> $\Delta$ -                       | Dcp2      | 0.068                             | 0.018 | 52.18             | 6.77  | 0.88          | 0.26 |
| <i>Edc3</i> $\Delta$ +                       | Dcp2      | 0.000                             | 0.000 | 0.00              | 0.00  | 0.00          | 0.00 |
| <i>Lsm4c</i> $\Delta$ -                      | Dcp2      | 0.081                             | 0.020 | 74.83             | 14.17 | 1.72          | 0.76 |
| <i>Lsm4c</i> $\Delta$ +                      | Dcp2      | 0.065                             | 0.024 | 2.23              | 1.48  | 0.03          | 0.03 |
| <i>Edc3</i> $\Delta$ <i>Lsm4c</i> $\Delta$ - | Dcp2      | 0.052                             | 0.011 | 12.75             | 7.95  | 0.21          | 0.12 |
| <i>Edc3</i> $\Delta$ <i>Lsm4c</i> $\Delta$ + | Dcp2      | 0.000                             | 0.000 | 0.00              | 0.00  | 0.00          | 0.00 |
| <i>Edc3</i> $\Delta$ <i>Pat1</i> $\Delta$ -  | Dcp2      | 0.000                             | 0.000 | 0.00              | 0.00  | 0.00          | 0.00 |
| <i>Edc3</i> $\Delta$ <i>Pat1</i> $\Delta$ +  | Dcp2      | 0.000                             | 0.000 | 0.00              | 0.00  | 0.00          | 0.00 |
| <i>Pat1</i> $\Delta$ -                       | Edc3      | 0.097                             | 0.010 | 77.16             | 3.05  | 1.02          | 0.02 |
| <i>Pat1</i> $\Delta$ +                       | Edc3      | 0.072                             | 0.008 | 49.74             | 8.85  | 0.91          | 0.12 |
| <i>Dhh1</i> $\Delta$ -                       | Edc3      | 0.077                             | 0.022 | 88.34             | 10.30 | 2.10          | 0.35 |
| <i>Dhh1</i> $\Delta$ +                       | Edc3      | 0.066                             | 0.016 | 34.53             | 9.38  | 0.43          | 0.21 |
| <i>Dhh1</i> $\Delta$ <i>Pat1</i> $\Delta$ -  | Edc3      | 0.093                             | 0.025 | 46.69             | 20.82 | 0.71          | 0.42 |
| <i>Dhh1</i> $\Delta$ <i>Pat1</i> $\Delta$ +  | Edc3      | 0.099                             | 0.058 | 30.71             | 10.28 | 0.35          | 0.15 |
| <i>Dcp1</i> $\Delta$ -                       | Edc3      | 0.085                             | 0.035 | 97.64             | 2.67  | 3.67          | 0.72 |
| <i>Dcp1</i> $\Delta$ +                       | Edc3      | 0.087                             | 0.022 | 97.08             | 3.15  | 3.36          | 0.48 |
| <i>Xrn1</i> $\Delta$ -                       | Edc3      | 0.242                             | 0.047 | 94.87             | 8.88  | 6.37          | 4.47 |
| <i>Xrn1</i> $\Delta$ +                       | Edc3      | 0.484                             | 0.122 | 98.04             | 3.40  | 3.32          | 0.54 |

  

| <b>Pab1-GFP dataset</b>                      |  |                                  |       |                   |       |               |      |
|----------------------------------------------|--|----------------------------------|-------|-------------------|-------|---------------|------|
| Null strain +/- Glu                          |  | Av foci size ( $\mu\text{m}^2$ ) | SD    | Cells 1+ foci (%) | SD    | Av. Foci/Cell | SD   |
| BY4741 (WT) -                                |  | 0.060                            | 0.007 | 70.28             | 9.16  | 3.59          | 0.30 |
| BY4741 (WT) +                                |  | 0.000                            | 0.000 | 0.00              | 0.00  | 0.00          | 0.00 |
| <i>Pub1</i> $\Delta$ -                       |  | 0.043                            | 0.015 | 16.83             | 5.36  | 0.22          | 0.04 |
| <i>Pub1</i> $\Delta$ +                       |  | 0.000                            | 0.000 | 0.00              | 0.00  | 0.00          | 0.00 |
| <i>Ngr1</i> $\Delta$ -                       |  | 0.071                            | 0.008 | 75.92             | 14.94 | 3.91          | 1.43 |
| <i>Ngr1</i> $\Delta$ +                       |  | 0.028                            | 0.005 | 11.07             | 4.81  | 0.15          | 0.26 |
| <i>Pbp1</i> $\Delta$ -                       |  | 0.034                            | 0.017 | 24.24             | 9.16  | 0.52          | 0.19 |
| <i>Pbp1</i> $\Delta$ +                       |  | 0.000                            | 0.000 | 0.00              | 0.00  | 0.00          | 0.00 |
| <i>eIF4GI</i> $\Delta$ -                     |  | 0.064                            | 0.003 | 40.78             | 12.51 | 0.80          | 0.42 |
| <i>eIF4GI</i> $\Delta$ +                     |  | 0.000                            | 0.000 | 0.00              | 0.00  | 0.00          | 0.00 |
| <i>eIF4GII</i> $\Delta$ -                    |  | 0.058                            | 0.023 | 22.69             | 16.86 | 0.61          | 0.56 |
| <i>eIF4GII</i> $\Delta$ +                    |  | 0.000                            | 0.000 | 0.00              | 0.00  | 0.00          | 0.00 |
| yRP840 (WT) -                                |  | 0.104                            | 0.018 | 76.17             | 5.55  | 3.74          | 0.50 |
| yRP840 (WT) +                                |  | 0.000                            | 0.000 | 0.00              | 0.00  | 0.00          | 0.00 |
| <i>Edc3</i> $\Delta$ -                       |  | 0.067                            | 0.004 | 36.39             | 3.67  | 0.83          | 0.33 |
| <i>Edc3</i> $\Delta$ +                       |  | 0.000                            | 0.000 | 0.00              | 0.00  | 0.00          | 0.00 |
| <i>Lsm4c</i> $\Delta$ -                      |  | 0.073                            | 0.009 | 48.07             | 5.88  | 1.89          | 0.38 |
| <i>Lsm4c</i> $\Delta$ +                      |  | 0.000                            | 0.000 | 0.00              | 0.00  | 0.00          | 0.00 |
| <i>Edc3</i> $\Delta$ <i>Lsm4c</i> $\Delta$ - |  | 0.056                            | 0.005 | 23.81             | 2.10  | 0.64          | 0.04 |
| <i>Edc3</i> $\Delta$ <i>Lsm4c</i> $\Delta$ + |  | 0.000                            | 0.000 | 0.00              | 0.00  | 0.00          | 0.00 |
| <i>Edc3</i> $\Delta$ <i>Pat1</i> $\Delta$ -  |  | 0.044                            | 0.011 | 13.97             | 2.59  | 0.44          | 0.20 |
| <i>Edc3</i> $\Delta$ <i>Pat1</i> $\Delta$ +  |  | 0.000                            | 0.000 | 0.00              | 0.00  | 0.00          | 0.00 |
| <i>Pat1</i> $\Delta$ -                       |  | 0.033                            | 0.022 | 20.45             | 13.77 | 0.55          | 0.40 |

|                      |       |       |       |       |      |      |
|----------------------|-------|-------|-------|-------|------|------|
| <i>Pat1Δ</i> +       | 0.000 | 0.000 | 0.00  | 0.00  | 0.00 | 0.00 |
| <i>Dhh1Δ</i> -       | 0.045 | 0.005 | 26.72 | 11.29 | 1.35 | 0.92 |
| <i>Dhh1Δ</i> +       | 0.036 | 0.004 | 1.33  | 1.17  | 0.04 | 0.04 |
| <i>Dhh1Δ Pat1Δ</i> - | 0.038 | 0.025 | 25.03 | 20.82 | 0.68 | 0.42 |
| <i>Dhh1Δ Pat1Δ</i> + | 0.031 | 0.015 | 2.08  | 1.64  | 0.04 | 0.03 |
| <i>Dcp1Δ</i> -       | 0.106 | 0.050 | 83.48 | 6.41  | 5.23 | 1.03 |
| <i>Dcp1Δ</i> +       | 0.032 | 0.029 | 4.63  | 4.35  | 0.07 | 0.06 |
| <i>Xrn1Δ</i> -       | 0.285 | 0.061 | 95.01 | 1.27  | 6.80 | 3.07 |
| <i>Xrn1Δ</i> +       | 0.405 | 0.117 | 20.45 | 22.09 | 1.10 | 1.70 |

**Pub1-mCh dataset (Z-stack data)**

| Null strain +/- Glu   | Av foci size ( $\mu\text{m}^2$ ) | SD    | Cells 1+ foci (%) | SD    | Av. Foci/Cell | SD   |
|-----------------------|----------------------------------|-------|-------------------|-------|---------------|------|
| BY4741 (WT) -         | 0.089                            | 0.007 | 66.18             | 9.16  | 3.81          | 0.30 |
| BY4741 (WT) +         | 0.000                            | 0.000 | 0.00              | 0.00  | 0.00          | 0.00 |
| <i>Pbp1Δ</i> -        | 0.062                            | 0.005 | 30.16             | 32.15 | 0.95          | 0.79 |
| <i>Pbp1Δ</i> +        | 0.000                            | 0.000 | 0.00              | 0.00  | 0.00          | 0.00 |
| <i>4GIΔ</i> -         | 0.091                            | 0.012 | 70.99             | 27.00 | 4.08          | 2.96 |
| <i>4GIΔ</i> +         | 0.000                            | 0.000 | 0.00              | 0.00  | 0.00          | 0.00 |
| <i>4GIIΔ</i> -        | 0.067                            | 0.005 | 37.74             | 27.84 | 1.38          | 1.36 |
| <i>4GIIΔ</i> +        | 0.000                            | 0.000 | 0.00              | 0.00  | 0.00          | 0.00 |
| yRP840 (WT) -         | 0.096                            | 0.010 | 82.97             | 1.45  | 5.44          | 1.27 |
| yRP840 (WT) +         | 0.000                            | 0.000 | 0.00              | 0.00  | 0.00          | 0.00 |
| <i>Edc3Δ</i> -        | 0.066                            | 0.002 | 22.50             | 3.54  | 0.64          | 0.07 |
| <i>Edc3Δ</i> +        | 0.000                            | 0.000 | 0.00              | 0.00  | 0.00          | 0.00 |
| <i>Lsm4cΔ</i> -       | 0.078                            | 0.012 | 33.97             | 5.61  | 1.10          | 0.54 |
| <i>Lsm4cΔ</i> +       | 0.000                            | 0.000 | 0.00              | 0.00  | 0.00          | 0.00 |
| <i>Edc3Δ Lsm4cΔ</i> - | 0.053                            | 0.022 | 8.18              | 2.08  | 0.23          | 0.03 |
| <i>Edc3Δ Lsm4cΔ</i> + | 0.000                            | 0.000 | 0.00              | 0.00  | 0.00          | 0.00 |
| <i>Edc3Δ Pat1Δ</i> -  | 0.057                            | 0.017 | 9.91              | 7.91  | 0.48          | 0.34 |
| <i>Edc3Δ Pat1Δ</i> +  | 0.000                            | 0.000 | 0.00              | 0.00  | 0.00          | 0.00 |
| <i>Pat1Δ</i> -        | 0.063                            | 0.019 | 21.03             | 3.69  | 1.46          | 0.58 |
| <i>Pat1Δ</i> +        | 0.000                            | 0.000 | 0.00              | 0.00  | 0.00          | 0.00 |
| <i>Dhh1Δ</i> -        | 0.049                            | 0.004 | 35.36             | 26.86 | 1.54          | 1.61 |
| <i>Dhh1Δ</i> +        | 0.000                            | 0.000 | 0.00              | 0.00  | 0.00          | 0.00 |
| <i>Dhh1Δ Pat1Δ</i> -  | 0.073                            | 0.038 | 7.81              | 8.00  | 0.15          | 0.18 |
| <i>Dhh1Δ Pat1Δ</i> +  | 0.000                            | 0.000 | 0.00              | 0.00  | 0.00          | 0.00 |
| <i>Dcp1Δ</i> -        | 0.135                            | 0.002 | 87.40             | 2.39  | 3.65          | 1.55 |
| <i>Dcp1Δ</i> +        | 0.078                            | 0.013 | 67.15             | 3.83  | 1.51          | 0.18 |
| <i>Xrn1Δ</i> -        | 0.401                            | 0.096 | 70.04             | 4.77  | 2.67          | 1.30 |
| <i>Xrn1Δ</i> +        | 0.439                            | 0.236 | 73.04             | 1.31  | 1.63          | 0.29 |

**GCN2c dataset – Edc3-mCh**

| Strain +/- Glu      | Av foci size ( $\mu\text{m}^2$ ) | SD    | Cells 1+ foci (%) | SD    | Av. Foci/Cell | SD   |
|---------------------|----------------------------------|-------|-------------------|-------|---------------|------|
| WT + Empty vector - | 0.167                            | 0.045 | 94.87             | 4.44  | 3.50          | 1.27 |
| WT + Empty vector + | 0.097                            | 0.017 | 63.91             | 18.64 | 1.59          | 1.02 |
| WT + GCN2c -        | 0.181                            | 0.032 | 95.99             | 3.47  | 5.23          | 2.50 |
| WT + GCN2c +        | 0.118                            | 0.025 | 67.44             | 15.56 | 1.58          | 0.73 |

**GCN2c dataset – Pab1-GFP**

| Strain +/- Glu      | Av foci size ( $\mu\text{m}^2$ ) | SD    | Cells 1+ foci (%) | SD   | Av. Foci/Cell | SD   |
|---------------------|----------------------------------|-------|-------------------|------|---------------|------|
| WT + Empty vector - | 0.080                            | 0.010 | 88.09             | 8.21 | 5.59          | 3.02 |
| WT + Empty vector + | 0.026                            | 0.015 | 1.11              | 1.93 | 0.01          | 0.02 |
| WT + GCN2c -        | 0.110                            | 0.033 | 95.59             | 3.87 | 8.94          | 3.98 |
| WT + GCN2c +        | 0.034                            | 0.012 | 6.20              | 4.45 | 0.13          | 0.12 |

Table S2. Experimental reagents

| Name                 | Properties                                                                           | Reference                    |
|----------------------|--------------------------------------------------------------------------------------|------------------------------|
| <b>Yeast strains</b> |                                                                                      |                              |
| yRP840               | <i>MATa leu2-3,112 trp1 ura3-52 his4-539 cup1::LEU2/PGK1pG/MFA2pG</i>                | Hatfield et al., 1996        |
| yRP1199              | <i>MATa his4-539 leu2-3,112 trp1-Δ1 ura3-52 xm1::URA3</i>                            | Anderson and Parker, 1998    |
| yRP1200              | <i>MATa his4-539 leu2-3, 112 trp1-Δ1 ura3-52 dcp1::URA3</i>                          | Anderson and Parker, 1998    |
| yRP1358              | <i>MATa his4 leu2 lys2 trp1 ura3 dcp2::TRP1</i>                                      | Dunckley and Parker, 1999    |
| yRP1600              | <i>MATa his4 leu2 cup1::LEU2PM trp1 ura3 pat1::LEU2</i>                              | Segal et al., 2006           |
| yRP1745              | <i>MATa his4-539 leu2-3112 trp1 ura3-52 edc3::NEO cup1::LEU2/PGK1pG/MFA2pG</i>       | Kshirsagar and Parker, 2004  |
| yRP1752              | <i>MATa trp1 leu- ura- edc3::NEO pat1::LEU2 cup1::LEU2/PGK1pG/MFA2pG</i>             | Kshirsagar and Parker, 2004  |
| yRP1941              | <i>MATa leu2 ura3 his3 met15 EIF4GI-GFP (HIS)</i>                                    | Bregues and Parker, 2003     |
| yRP1946              | <i>MATa leu2 ura3 his3 met15 EIF4E-GFP (HIS)</i>                                     | Bregues and Parker, 2003     |
| yRP2065              | <i>MATa his3D1 leu2D0 met15D0 ura3D0 ('BY4741')</i>                                  |                              |
| yRP2069              | <i>MATa ura3 leu2 his3 pat1Δ::KanMX dhh1Δ::KanMX</i>                                 | Coller and Parker, 2005      |
| yRP2160              | <i>MATa ura3 leu2 his4 trp1 lys2 cup1::LEU2/PGK1pG/MFA2pG m dhh1::URA3</i>           | Unpublished data             |
| yRP2190              | <i>MATa leu2 ura3 his3 met15 PRT1-GFP (HIS)</i>                                      | Huh et al., 2003             |
| yRP2191              | <i>MATa leu2-3,112 trp1 ura3-52 his4-539 cup1::LEU2/PGK1pG/MFA2pG PAB1-GFP (NEO)</i> | Bregues and Parker, 2003     |
| yRP2337              | <i>MATa leu2 trp1 ura3 lys2 cup1::LEU2/PGK1pG/MFA2pG Lsm4Dc::NEO</i>                 | Decker et al., 2007          |
| yRP2338              | <i>MATa leu2 trp1 ura3 lys2 his4 cup1::LEU2/PGK1pG/MFA2pG Lsm4Dc::NEO edc3::NEO</i>  | Decker et al., 2007          |
| yRP2346              | <i>MATa leu2-3,112 trp1 ura3-52 his4-539 cup1::LEU2/PGK1pG/MFA2pG PBP1-GFP (NEO)</i> | This study                   |
| yRP2519              | <i>MATa leu2 ura3 his3 met15 EIF4GII-GFP (HIS)</i>                                   | Huh et al., 2003             |
| yRP2520              | <i>MATa leu2 ura3 his3 met15 SUI2-GFP (HIS)</i>                                      | Huh et al., 2003             |
| yRP2521              | <i>MATa leu2 ura3 his3 met15 GCN3-GFP (HIS)</i>                                      | Huh et al., 2003             |
| yRP2522              | <i>MATa leu2 ura3 his3 met15 SUP35-GFP (HIS)</i>                                     | Huh et al., 2003             |
| yRP2523              | <i>MATa leu2 ura3 his3 met15 SUP45-GFP (HIS)</i>                                     | Huh et al., 2003             |
| yRP2524              | <i>MATa leu2 ura3 his3 met15 PUB1-GFP (HIS)</i>                                      | Huh et al., 2003             |
| yRP2525              | <i>MATa leu2 ura3 his3 met15 NGR1-GFP (HIS)</i>                                      | Huh et al., 2003             |
| yRP2526              | <i>MATa leu2 ura3 his3 met15 NRP1-GFP (HIS)</i>                                      | Huh et al., 2003             |
| yRP2527              | <i>MATa leu2 ura3 his3 met15 EAP1-GFP (HIS)</i>                                      | Huh et al., 2003             |
| yRP2528              | <i>MATa leu2 ura3 his3 met15 YGR250C-GFP (HIS)</i>                                   | Huh et al., 2003             |
| yRP2529              | <i>MATa leu2 ura3 his3 met15 HRP1-GFP (HIS)</i>                                      | Huh et al., 2003             |
| yRP2530              | <i>MATa leu2 ura3 his3 met15 GBP2-GFP (HIS)</i>                                      | Huh et al., 2003             |
| yRP2531              | <i>MATa his3D1 leu2D0 met15D0 ura3D0 pbp1::KANMX</i>                                 | Invitrogen/Resgen collection |
| yRP2532              | <i>MATa his3D1 leu2D0 met15D0 ura3D0 pub1::KANMX</i>                                 | Invitrogen/Resgen collection |
| yRP2533              | <i>MATa his3D1 leu2D0 met15D0 ura3D0 eIF4GI::KANMX</i>                               | Invitrogen/Resgen collection |
| yRP2534              | <i>MATa his3D1 leu2D0 met15D0 ura3D0 eIF4GII::KANMX</i>                              | Invitrogen/Resgen collection |
| yRP2535              | <i>MATa his3D1 leu2D0 met15D0 ura3D0 ngr1::KANMX</i>                                 | Invitrogen/Resgen collection |

| <b>Plasmids</b> |                                                                                            |                           |
|-----------------|--------------------------------------------------------------------------------------------|---------------------------|
| pRP1192         | Tet promoter-regulated MFA2pG; Cen; <i>URA3</i> marker                                     | Bregues et al., 2005      |
| pRP1205         | Wt Dcp2 + promoter; Cen; <i>LYS2</i> marker                                                | Unpublished data          |
| pRP1400         | Lsm1-mCh; Cen; <i>LEU2</i> marker                                                          | Beckham et al., 2007      |
| pRP1432         | Wt Edc3 + promoter; Cen; <i>TRP1</i> marker                                                | Unpublished data          |
| pRP1574         | Edc3-mCh; Cen; <i>URA3</i> marker                                                          | This study                |
| pRP1575         | Edc3-mCh; Cen; <i>TRP1</i> marker                                                          | This study                |
| pRP1657         | Pab1-GFP, Edc3-mCh; Cen; <i>URA3</i> marker                                                | This study                |
| pRP1658         | Pab1-GFP, Dcp2-mCh; Cen; <i>URA3</i> marker                                                | This study                |
| pRP1659         | Pab1-GFP, Edc3-mCh; Cen; <i>TRP1</i> marker                                                | This study                |
| pRP1660         | Pab1-GFP, Dcp2-mCh; Cen; <i>TRP1</i> marker                                                | This study                |
| pRP1661         | Pub1-mCh; Cen; <i>URA3</i> marker                                                          | This study                |
| pRP1662         | Pub1-mCh; Cen; <i>TRP1</i> marker                                                          | This study                |
| pRP1663         | Gcn2c ('GCN2c-515'); Cen; <i>URA3</i> marker                                               | Ramirez et al., 1992      |
| pRS416          | Empty cloning vector; Cen; <i>URA3</i> marker                                              | Christianson et al., 1992 |
| <b>Oligos</b>   |                                                                                            |                           |
| oRP121          | AATTCCCCCCCCCCCCCCCCCA                                                                     | Muhlrad et al., 1994      |
| oRP1405         | CAAAGTACCACCATGGCCACCATAATAGTAGTACCAGTGGCCATAAACGGATCCCCGGGTTAATTAAC                       | This study                |
| oRP1406         | CATGAATTTACTATATATATTGCTTTTCTGACGTGCTTCCTCAGAAATTCGAGCTCGTTTAACTGG                         | This study                |
| oRP1407         | CTTCGATTAACAGTTTTCGTTAAACATGATTGATCTAGAGTCGACCGCACACTTCGAAATGGCCTCTTTG                     | This study                |
| oRP1408         | CAGGAAACAGCTATGACCATGATTACGCCAAGCTTGCATGCCTGCACTCGAGCAAATCTAATAGCAGGGAC<br>CCGTC           | This study                |
| oRP1409         | CTTCGATTAACAGTTTTCGTTAAACATGATTGATCTAGAGTCGACCGCTCGTAAGGCTGCACTGCAG                        | This study                |
| oRP1410         | CAGGAAACAGCTATGACCATGATTACGCCAAGCTTGCATGCCTGCACTGACCGACTTCCTATGCAAAATGC<br>TTAATAATTC      | This study                |
| oRP1411         | AAACTGATCTTTTCTGCACTGACGGTCCCTGCTATTAGATTGCTCGAGCCCGGTTAATTAACATGGTGA<br>GCAAGGGCGAGGAG    | This study                |
| oRP1412         | TGGAAGTTCAGGGTCTAATGAATTATTAAGCATTTGCATAGGAAGCGTACGCCCGGTTAATTAACATGGT<br>GAGCAAGGGCGAGGAG | This study                |
| oRP1413         | CAGGAAACAGCTATGACCATGATTACGCCAAGCTTGCATGCCTGCAAGGCATAAAGGCATTAAGAGGAGG                     | This study                |
| oRP1414         | CGATTAACAGTTTTCGTTAAACATGATTGATCTAGAGTCGACCGTGATTTATTTGCTTACCCTTCCCAC                      | This study                |
| oRP1415         | CCTCCTCGCCCTGCTCACCATGTTAATTAACCCGGGCTCGAGTTGTTGTTGCTGCTGTTGCTGCTG                         | This study                |

## References

- Anderson, J.S., and R.P. Parker. 1998. The 3' to 5' degradation of yeast mRNAs is a general mechanism for mRNA turnover that requires the SKI2 DEVH box protein and 3' to 5' exonucleases of the exosome complex. *EMBO J.* 17:1497–1506. [PubMed doi:10.1093/emboj/17.5.1497](https://pubmed.ncbi.nlm.nih.gov/101093/)
- Beckham, C.J., H.R. Light, T.A. Nissan, P. Ahlquist, R. Parker, and A. Noueir. 2007. Interactions between brome mosaic virus RNAs and cytoplasmic processing bodies. *J. Virol.* 81:9759–9768. [PubMed doi:10.1128/JVI.00844-07](https://pubmed.ncbi.nlm.nih.gov/101128/)
- Bregues, M., and R. Parker. 2007. Accumulation of polyadenylated mRNA, Pab1p, eIF4E, and eIF4G with P-bodies in *Saccharomyces cerevisiae*. *Mol. Biol. Cell.* 18:2592–2602. [PubMed doi:10.1091/mbc.E06-12-1149](https://pubmed.ncbi.nlm.nih.gov/101091/)
- Bregues, M., D. Teixeira, and R. Parker. 2005. Movement of eukaryotic mRNA between polysomes and cytoplasmic processing bodies.

- Science*. 310:486–489. [PubMed doi:10.1126/science.1115791](#)
- Christianson, T.W., R.S. Sikorski, M. Dante, J.H. Shero, and P. Hieter. 1992. Multifunctional yeast high-copy-number shuttle vectors. *Gene*. 110:119–122. [PubMed doi:10.1016/0378-1119\(92\)90454-W](#)
- Coller, J., and R. Parker. 2005. General translational repression by activators of mRNA decapping. *Cell*. 122:875–886. [PubMed doi:10.1016/j.cell.2005.07.012](#)
- Decker, C.J., D. Teixeira, and R. Parker. 2007. Edc3p and a glutamine/asparagine-rich domain of Lsm4p function in processing body assembly in *Saccharomyces cerevisiae*. *J. Cell Biol.* 179:437–449. [PubMed doi:10.1083/jcb.200704147](#)
- Dunkley, T., and R. Parker. 1999. The DCP2 protein is required for mRNA decapping in *Saccharomyces cerevisiae* and contains a functional MutT motif. *EMBO J.* 18:5411–5422. [PubMed doi:10.1093/emboj/18.19.5411](#)
- Hatfield, L., C.A. Beelman, A. Stevens, and R. Parker. 1996. Mutations in trans-acting factors affecting mRNA decapping in *Saccharomyces cerevisiae*. *Mol. Cell. Biol.* 16:5830–5838. [PubMed](#)
- Huh, W.K., J.V. Falvo, L.C. Gerke, A.S. Carroll, R.W. Howson, A. Belle, N. Dephoure, E.K. O'Shea, and J.S. Weissman. 2003. Global analysis of protein localization in budding yeast. *Nature*. 425:686–691. [PubMed doi:10.1038/nature02026](#)
- Kshirsagar, M., and R. Parker. 2004. Identification of Edc3p as an Enhancer of mRNA Decapping in *Saccharomyces cerevisiae*. *Genetics*. 166:729–739. [PubMed doi:10.1534/genetics.166.2.729](#)
- Muhlrad, D., C.J. Decker, and R. Parker. 1994. Deadenylation of the unstable mRNA encoded by the yeast MFA2 gene leads to decapping followed by 5'→3' digestion of the transcript. *Genes Dev.* 8:855–866. [PubMed doi:10.1101/gad.8.7.855](#)
- Ramirez, M., R.C. Wek, C.R. Vazquez de Aldana, B.M. Jackson, B. Freeman, and A.G. Hinnebusch. 1992. Mutations activating the yeast eIF-2 alpha kinase GCN2: isolation of alleles altering the domain related to histidyl-tRNA synthetases. *Mol. Cell. Biol.* 12:5801–5815. [PubMed](#)
- Segal, S.P., T. Dunkley, and R. Parker. 2006. Sbp1p affects translational repression and decapping in *Saccharomyces cerevisiae*. *Mol. Cell. Biol.* 26:5120–5130. [PubMed doi:10.1128/MCB.01913-05](#)
